# Supplementary material
Source: MDPI journal article supplement (https://www.mdpi.com/2673-4583/3/1/24)
Supplement: s1 [file s1]

CSAC  
2021

THE 1<sup>ST</sup> INTERNATIONAL ELECTRONIC CONFERENCE ON  
CHEMICAL SENSORS AND ANALYTICAL CHEMISTRY

# ELECTROCHEMICAL IMMUNOSENSOR FOR SIMULTANEOUS DETERMINATION OF EMERGING AUTOIMMUNE DISEASE BIOMARKERS IN HUMAN SERUM

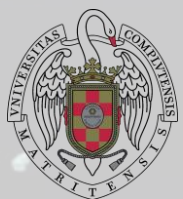

ebe

**E. Sánchez-Tirado, S. Guerrero, A. González-Cortés, L. Agüí, P. Yáñez-Sedeño, J.M. Pingarrón**

Department of Analytical Chemistry, Faculty of Chemistry, University Complutense of Madrid,  
Avda. Complutense s/n, 28040, Madrid España

# AUTOIMMUNE DISEASES

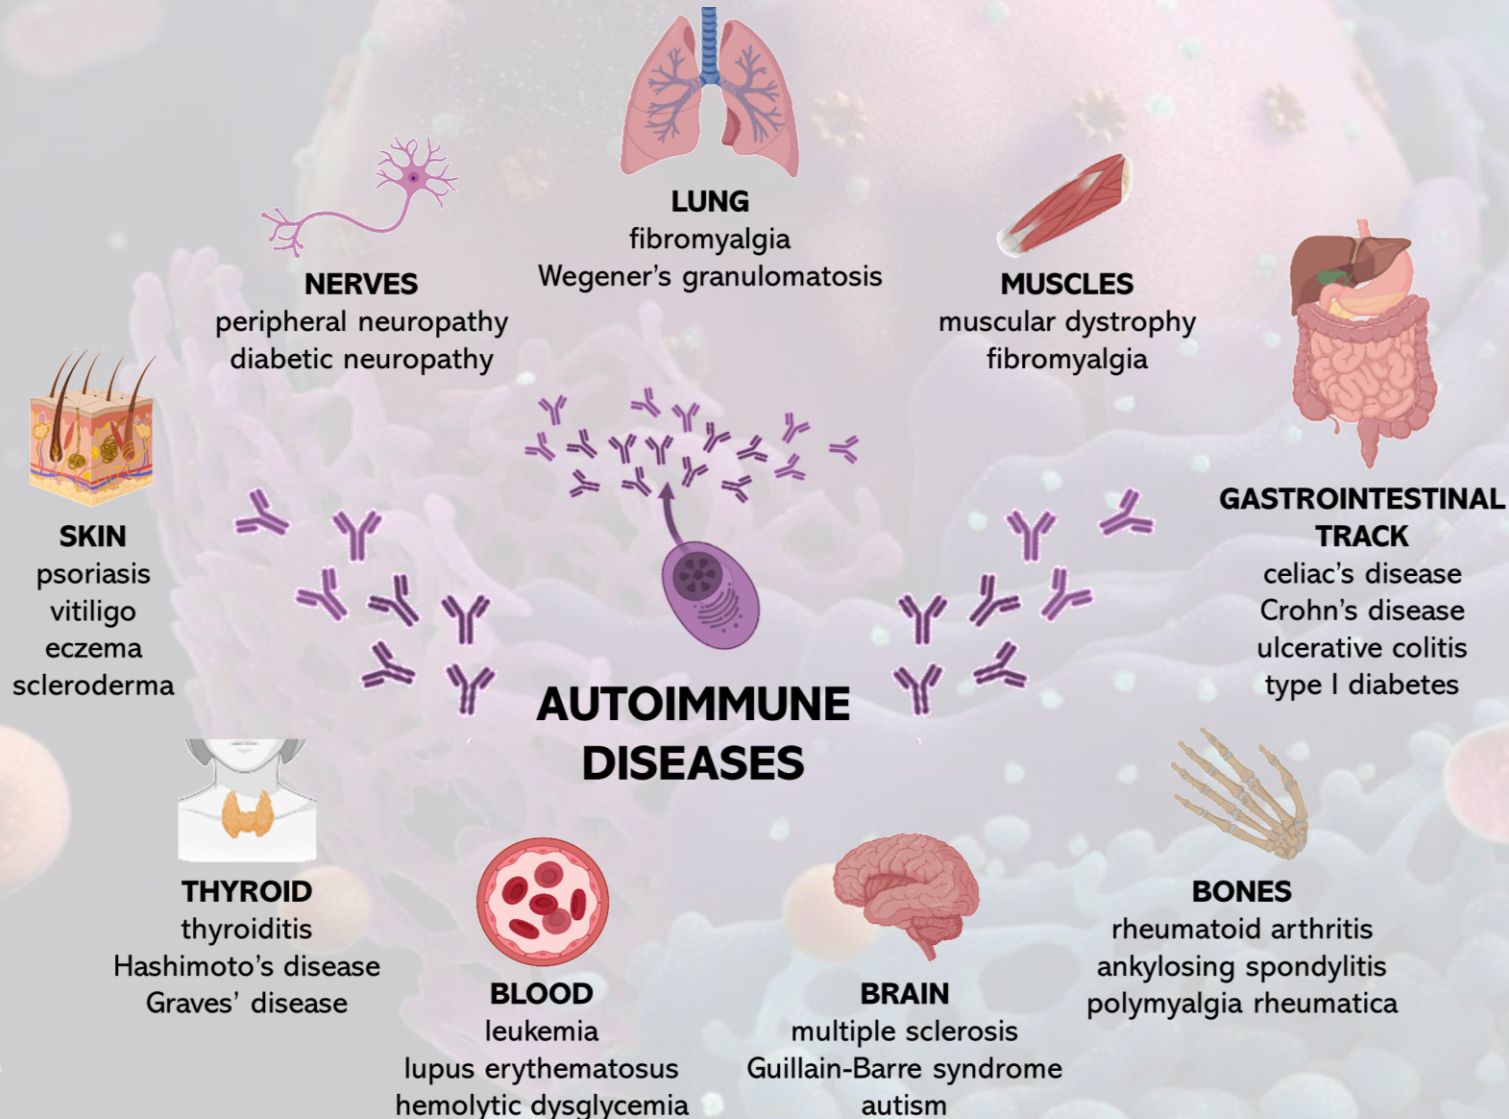

## POSSIBLE CAUSES AND RISK FACTORS

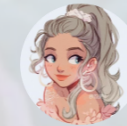

### AGE

symptoms usually begin between 15 and 45 years

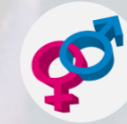

### GENDER

affects women more than men

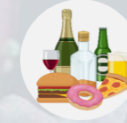

### LIFESTYLE

western diet, alcohol and tobacco

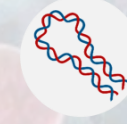

### HEREDITY

genetic predisposition

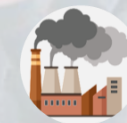

### ENVIRONMENT

chemicals, heavy metals, infections, stress

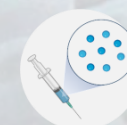

### HYGIENE HYPOTHESIS

vaccines, antiseptics

# RHEUMATOID ARTHRITIS

- 1 characterized by joint inflammation and destruction
- 2 functional limitations
- 3 working disability
- 4 poor quality of life

**ATTENTION**

**EARLY DIAGNOSIS AND TREATMENT  
REDUCE JOINT DESTRUCTION,  
PRESERVE FUNCTIONALITY  
AND INCREASE SURVIVAL RATE**

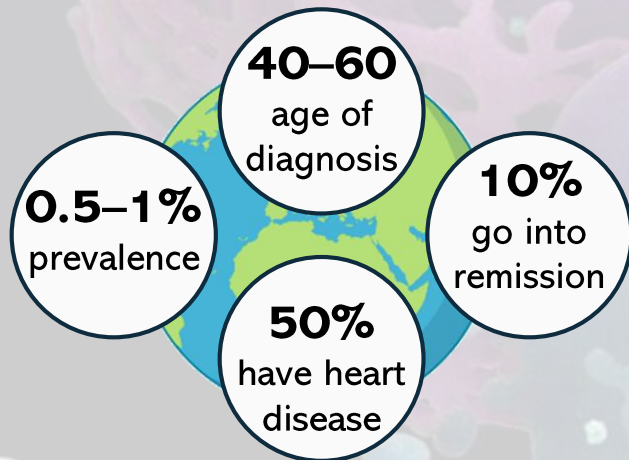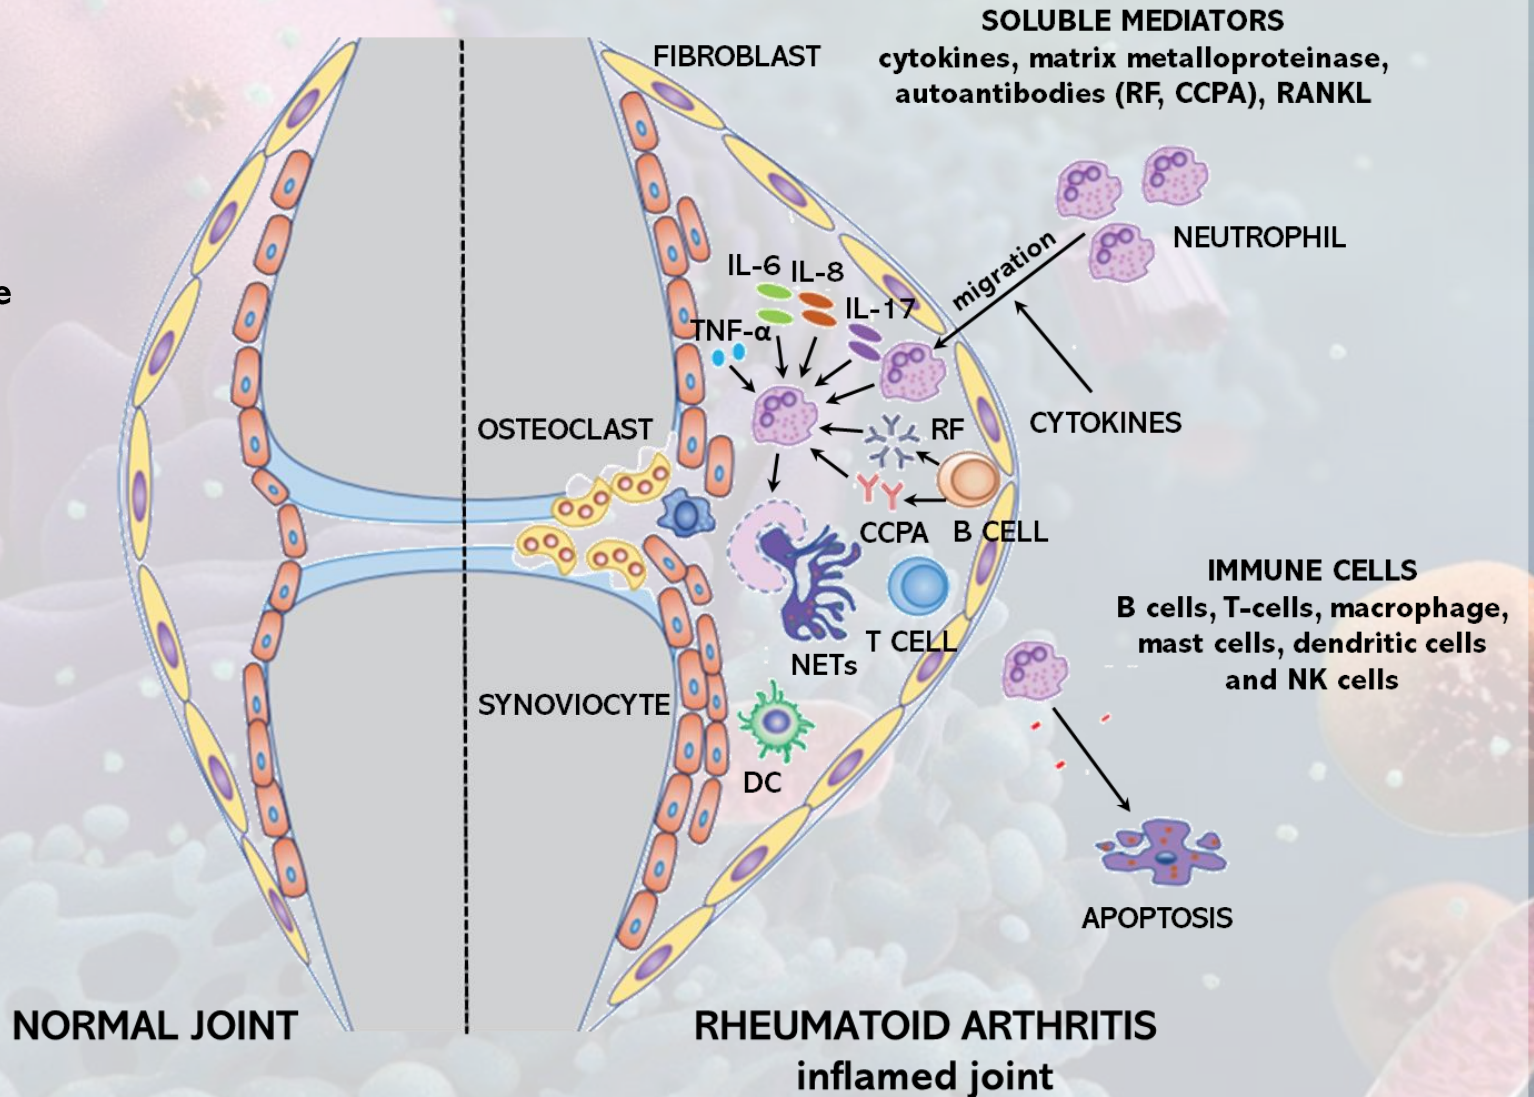

# RHEUMATOID ARTHRITIS BIOMARKERS

## NEUTROPHIL ACTIVATING PROTEIN-2 (CXCL7)

highly expressed in serum, synovial fluid  
and synovial tissue of patients  
developing rheumatoid arthritis during  
the first 12 weeks but at lower levels in  
long-term ones

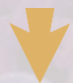

useful to reflect local  
pathological changes

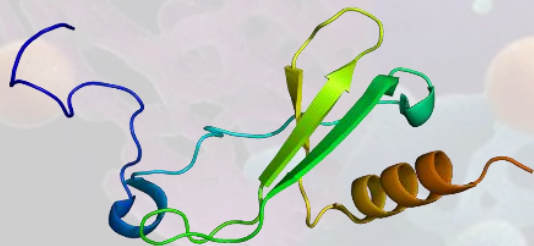

## MATRIX METALLOPROTEINASE-3 (MMP-3)

synthesized and secreted by inflamed synovium  
and stimulated chondrocyte in response to  
cytokines in the joints

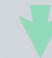

actively involved in joint destruction in  
rheumatoid arthritis patients

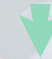

useful biomarker to evaluate the  
progression of the disease

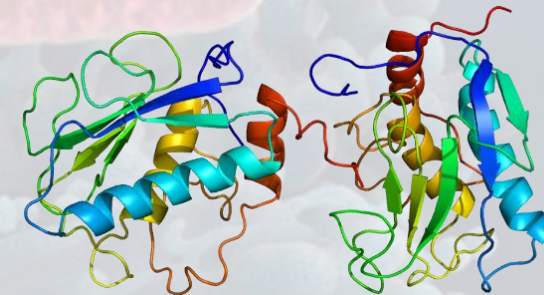

# MAGNETIC BEAD-BASED ELECTROCHEMICAL IMMUNOSENSORS

## ELECTROCHEMICAL IMMUNOSENSORS

- high sensitivity
- high selectivity
- quick and simple procedures
- short response times
- compatible with turbid samples
- disposable
- portable
- inexpensive

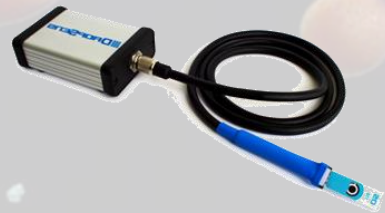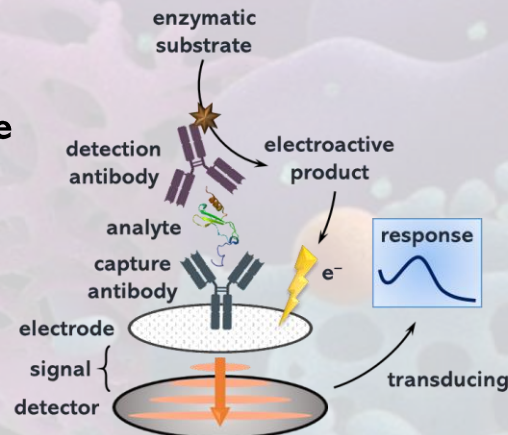

## MAGNETIC BEADS

- high versatility
- lower detection limits
- minimal matrix effects
- small volume of reagents, sample, and waste produced

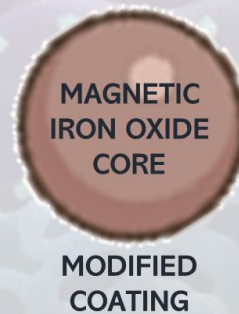

## SCREEN-PRINTED CARBON ELECTRODES

- miniaturization
- small sample volume
- disposable
- specific and multiplex applications
- portability
- mass production
- versatility to customize

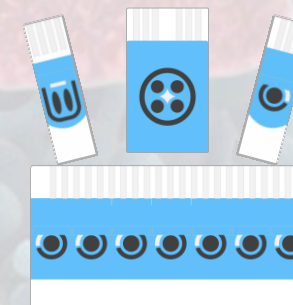

- higher sample throughput
- less sample consumption
- reduced turnaround times
- improved test efficiency
- more reasonable cost

# SIMULTANEOUS MATRIX METALLOPROTEINASE-3 AND NEUTROPHIL ACTIVATING PROTEIN-2 DETERMINATION

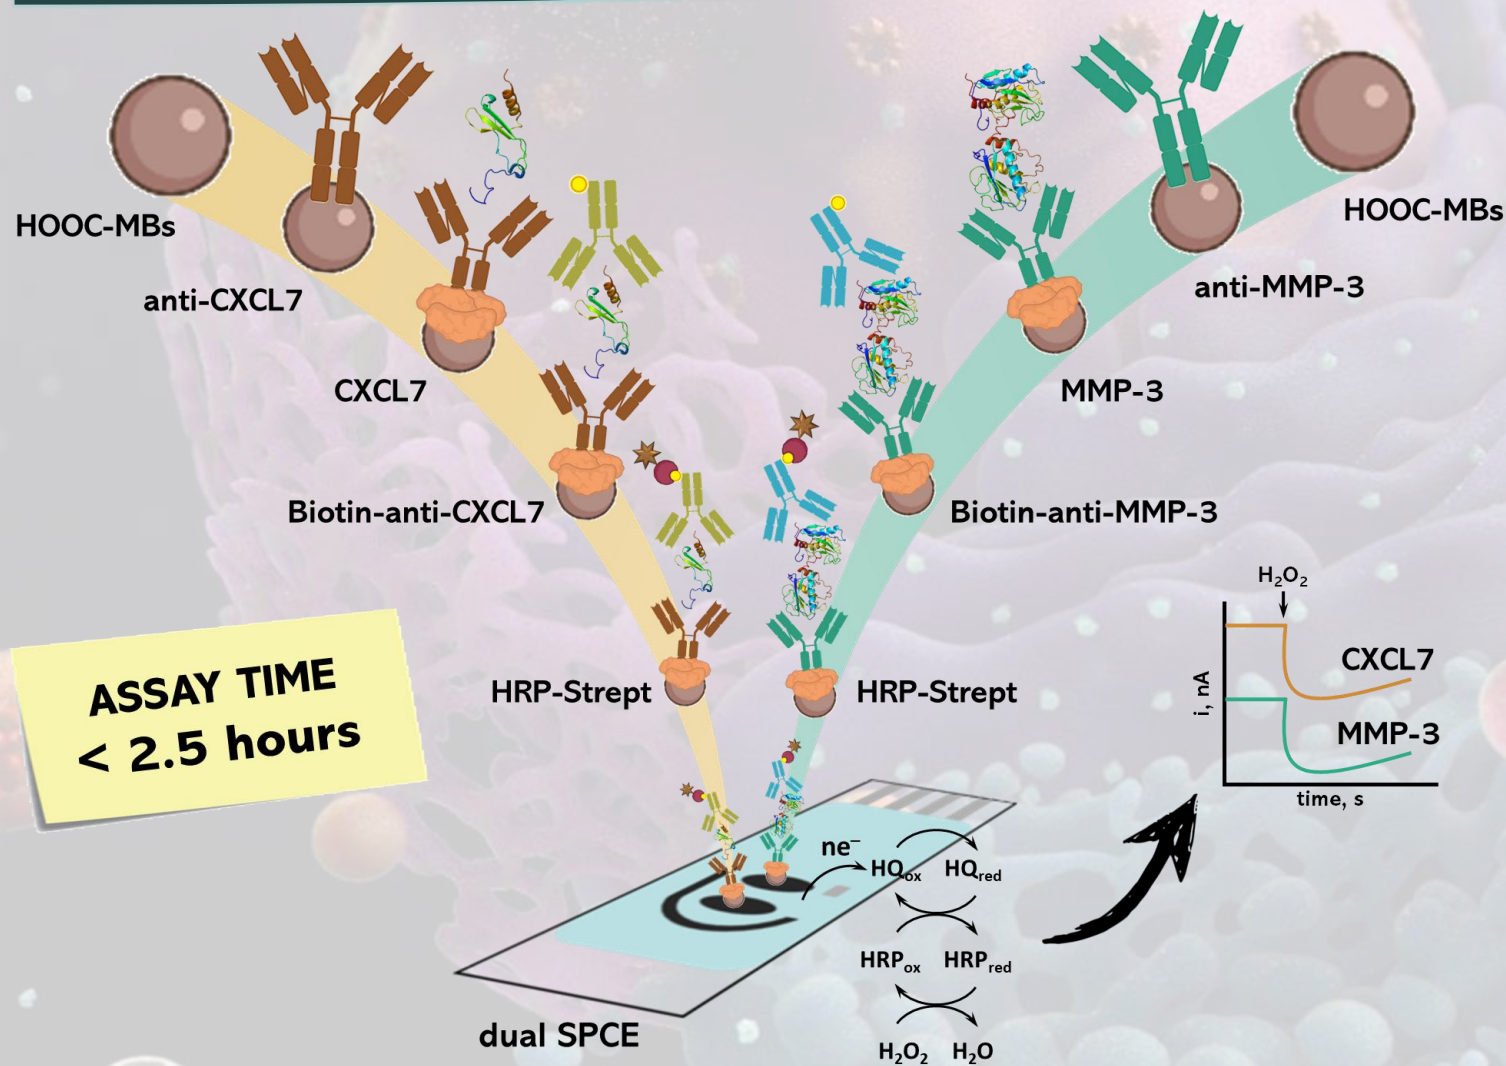

**ASSAY TIME  
< 2.5 hours**

## CXCL7

| STUDIED VARIABLE                                      | EVALUATED RANGE | SELECTED VALUE |
|-------------------------------------------------------|-----------------|----------------|
| [anti-CXCL7], $\mu\text{g}\cdot\text{mL}^{-1}$        | 2.5 – 25        | 10             |
| $t_{\text{anti-CXCL7}}$ , min                         | 30 – 75         | 45             |
| $t_{\text{blocking}}$ , min                           | 0 – 45          | 30             |
| [Biotin-anti-CXCL7], $\mu\text{g}\cdot\text{mL}^{-1}$ | 0.05 – 0.5      | 0.25           |
| $t_{\text{Biotin-anti-CXCL7}}$ , min                  | 30 – 90         | 60             |
| [HRP-Strept], dil                                     | 1/4000 – 1/250  | 1/2000         |
| $t_{\text{HRP-Strept}}$ , min                         | 10 – 30         | 20             |

## MMP-3

| STUDIED VARIABLE                                      | EVALUATED RANGE | SELECTED VALUE |
|-------------------------------------------------------|-----------------|----------------|
| [anti-MMP-3], $\mu\text{g}\cdot\text{mL}^{-1}$        | 5 – 20          | 15             |
| $t_{\text{anti-MMP-3}}$ , min                         | 30 – 75         | 45             |
| $t_{\text{blocking}}$ , min                           | 0 – 45          | 30             |
| [Biotin-anti-MMP-3], $\mu\text{g}\cdot\text{mL}^{-1}$ | 0.5 – 2         | 1              |
| $t_{\text{Biotin-anti-MMP-3}}$ , min                  | 15 – 60         | 45             |
| [HRP-Strept], dil                                     | 1/1500 – 1/250  | 1/500          |
| $t_{\text{HRP-Strept}}$ , min                         | 10 – 30         | 20             |

# SIMULTANEOUS MATRIX METALLOPROTEINASE-3 AND NEUTROPHIL ACTIVATING PROTEIN-2 DETERMINATION

## CALIBRATION PLOTS AND ANALYTICAL CHARACTERISTICS

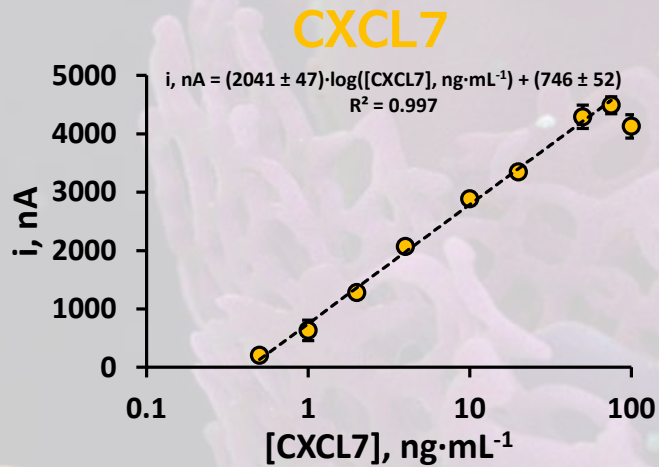

**LINEAR RANGE:**  
 1 – 75  $\text{ng} \cdot \text{mL}^{-1}$   
 $R^2 = 0.997$   
 LOD: 0.8  $\text{ng} \cdot \text{mL}^{-1}$

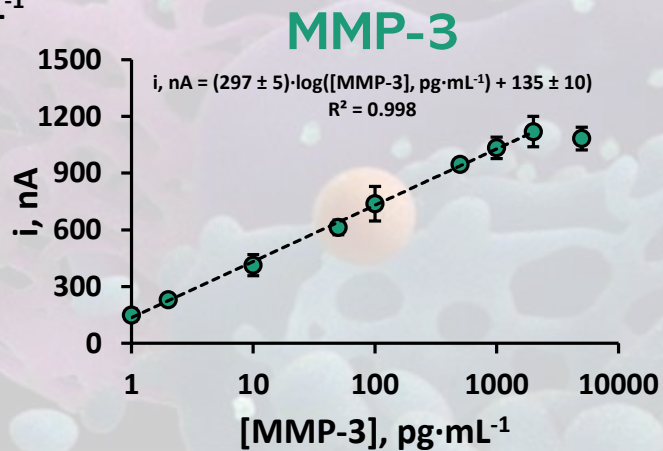

**LINEAR RANGE:**  
 2 – 2000  $\text{pg} \cdot \text{mL}^{-1}$   
 $R^2 = 0.998$   
 LOD: 1.2  $\text{pg} \cdot \text{mL}^{-1}$

## EVALUATION OF CROSS-TALK

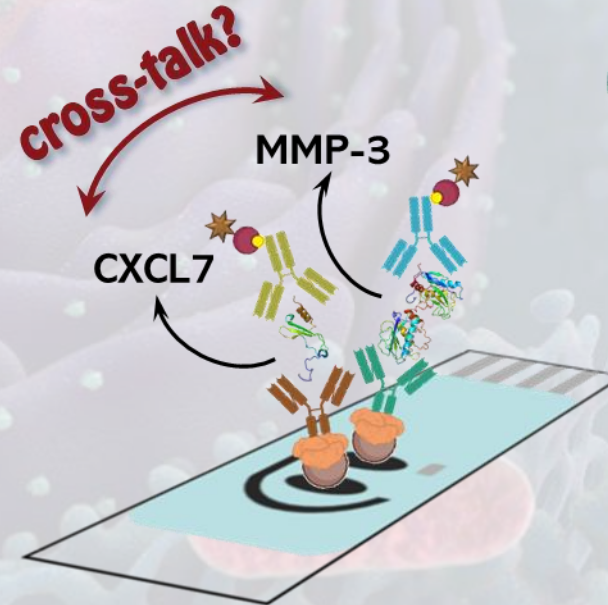

**NO CROSS-TALK**  
 between working electrodes!

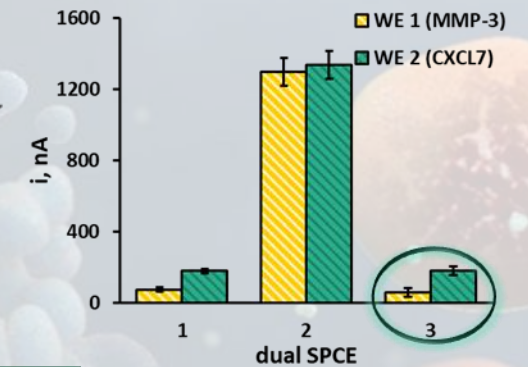

| DUAL | WE 1 (anti-MMP-3)                            | WE 2 (anti-CXCL7)                            |
|------|----------------------------------------------|----------------------------------------------|
| 1    | [MMP-3] = 0 $\text{ng} \cdot \text{mL}^{-1}$ | [CXCL7] = 0 $\text{ng} \cdot \text{mL}^{-1}$ |
| 2    | [MMP-3] = 2 $\text{ng} \cdot \text{mL}^{-1}$ | [CXCL7] = 2 $\text{ng} \cdot \text{mL}^{-1}$ |
| 3    | [CXCL7] = 2 $\text{ng} \cdot \text{mL}^{-1}$ | [MMP-3] = 2 $\text{ng} \cdot \text{mL}^{-1}$ |

# SIMULTANEOUS MATRIX METALLOPROTEINASE-3 AND NEUTROPHIL ACTIVATING PROTEIN-2 DETERMINATION

## SELECTIVITY

CXCL7

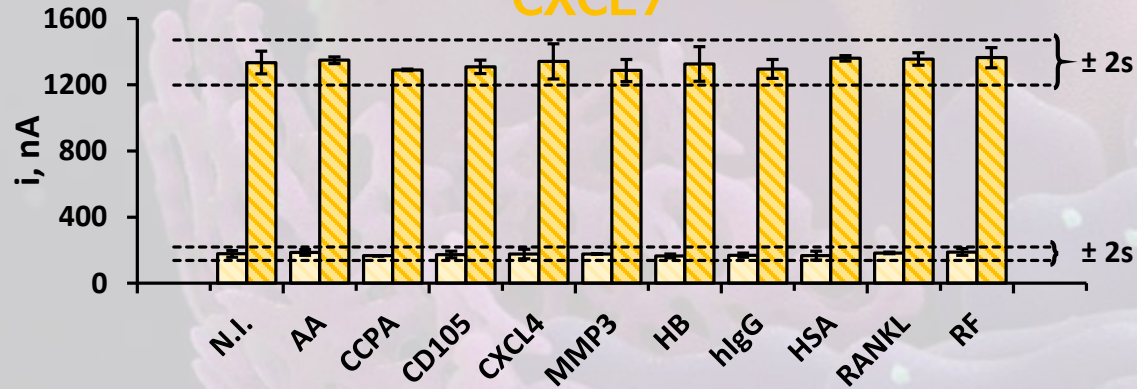

MMP-3

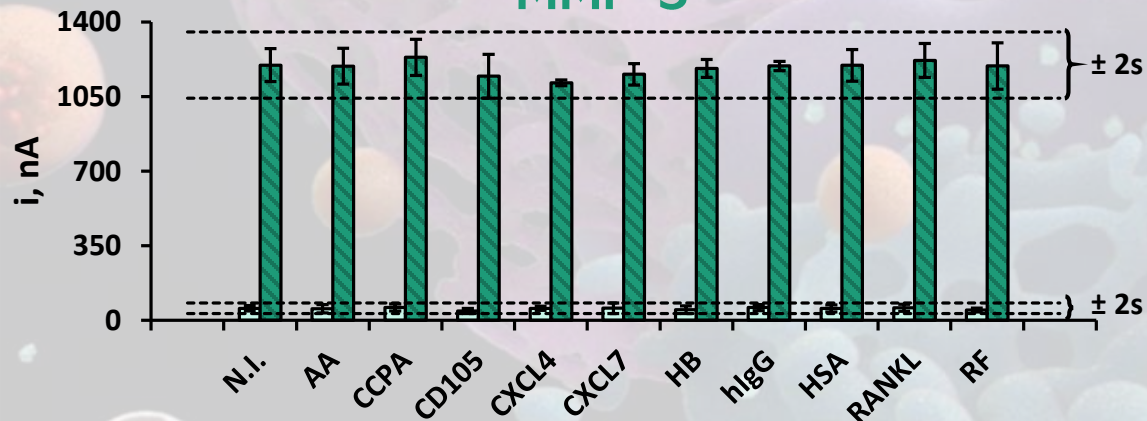

## STABILITY

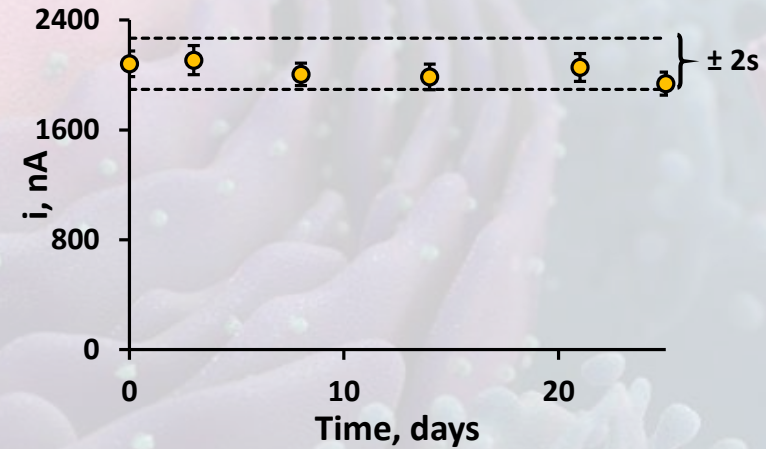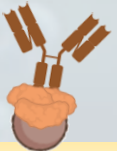

The immunoconjugate anti-CXCL7-HOOC-MBs can be stored in humidity at 8°C, being stable for at least 25 days

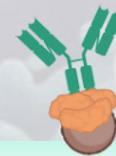

The immunoconjugate anti-MMP-3-HOOC-MBs can be stored in humidity at 8°C, being stable for at least 25 days

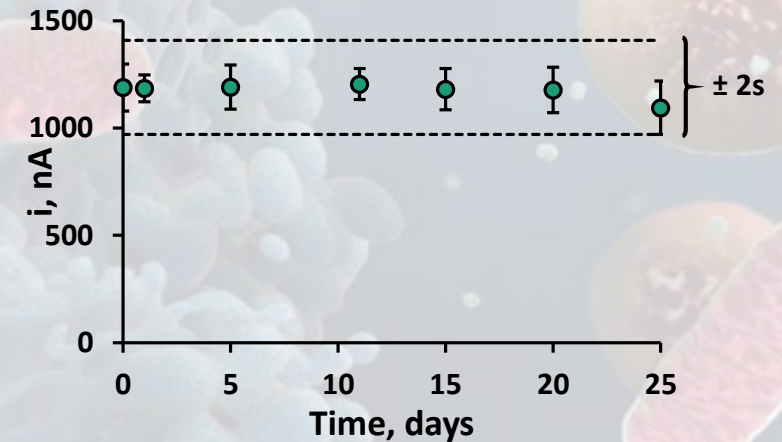



# SIMULTANEOUS MATRIX METALLOPROTEINASE-3 AND NEUTROPHIL ACTIVATING PROTEIN-2 DETERMINATION

## SERUM SAMPLE ANALYSIS

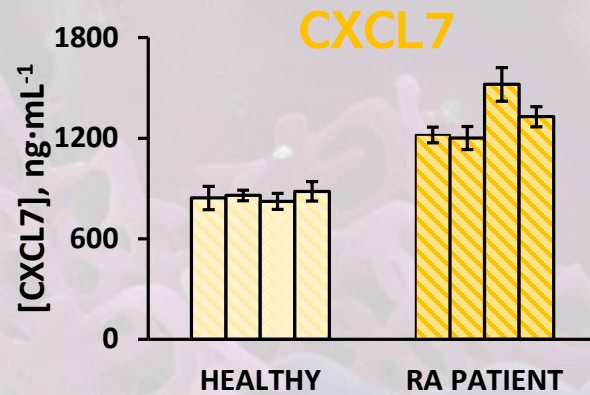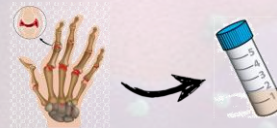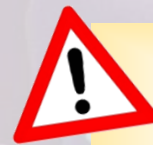

1/50 dilution  
in PBS pH 7.4

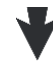

**NO MATRIX EFFECT!!**

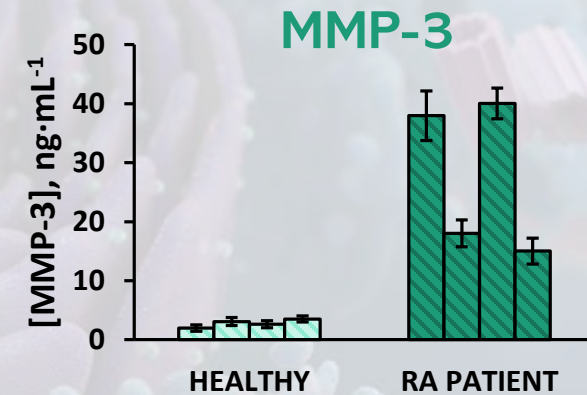

| SAMPLE    | BIOSENSOR, ng·mL <sup>-1</sup><br>(n = 4) | ELISA, ng·mL <sup>-1</sup><br>(n = 2) |
|-----------|-------------------------------------------|---------------------------------------|
| Healthy 1 | 843 ± 70                                  | 832 ± 81                              |
| Healthy 2 | 858 ± 32                                  | 860 ± 65                              |
| Healthy 3 | 823 ± 48                                  | 821 ± 73                              |
| Healthy 4 | 883 ± 57                                  | 891 ± 58                              |
| RA 1      | 1219 ± 47                                 | 1226 ± 51                             |
| RA 2      | 1521 ± 100                                | 1513 ± 72                             |
| RA 3      | 1328 ± 60                                 | 1308 ± 65                             |
| RA 4      | 1201 ± 69                                 | 1195 ± 57                             |

| SAMPLE    | BIOSENSOR, ng·mL <sup>-1</sup><br>(n = 4) | ELISA, ng·mL <sup>-1</sup><br>(n = 2) |
|-----------|-------------------------------------------|---------------------------------------|
| Healthy 1 | 2.0 ± 0.5                                 | 2.0 ± 0.7                             |
| Healthy 2 | 3.1 ± 0.7                                 | 3.1 ± 0.8                             |
| Healthy 3 | 2.6 ± 0.6                                 | 3 ± 1                                 |
| Healthy 4 | 3.5 ± 0.5                                 | 3.4 ± 0.8                             |
| RA 1      | 38 ± 4                                    | 39 ± 5                                |
| RA 2      | 40 ± 3                                    | 40 ± 6                                |
| RA 3      | 15 ± 2                                    | 17 ± 4                                |
| RA 4      | 18 ± 2                                    | 19 ± 3                                |

# CONCLUSIONS AND FUTURE WORK

---

**1**

The preparation and implementation of a dual immunosensor for the simultaneous determination of neutrophil activating protein-2 and matrix metalloproteinase-3 was described for the first time

**2**

The proposed method exhibits better analytical characteristics in terms of sensitivity, clinically relevant linear range, reproducibility, storage stability and selectivity than conventional ELISA immunoassays. In addition, the proposed immunosensor require shorter analysis times and less reagent consumption

**3**

The application of the immunosensor to the determination of these biomarkers in serum samples has provided good results

**4**

The obtained results show that the initial objective of developing sensitive, reliable and robust analytical devices for the determination of these biomarkers in complex clinical samples, and, therefore, suitable to develop point-of-care devices was reasonably achieved

# ACKNOWLEDGEMENTS

**Spanish Ministry of Science, Innovation and Universities. ELECTRIMMUNE (RTI2018-096135-B-I00)**

**Spanish Ministry of Science, Innovation and Universities. ELECTROBIONET (RED2018-102412-T)**

**Program from the Community of Madrid. TRANSNANOAVANSENS-CM (S2018/NMT-4349)**

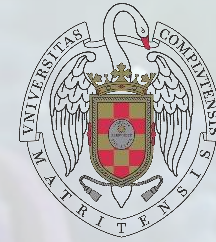

UNIVERSIDAD COMPLUTENSE  
MADRID

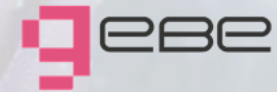

**Sara Guerrero Irigoyen**

**Dra. Esther Sánchez Tirado**

**Dra. Lourdes Agüí Chicharro**

**Dra. Araceli González Cortés**

**Prof. Paloma Yáñez-Sedeño Orive**

**Prof. José Manuel Pingarrón Carrazón**

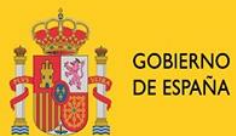

MINISTERIO  
DE CIENCIA, INNOVACIÓN  
Y UNIVERSIDADES

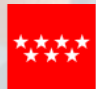

**Comunidad de Madrid**
